RESEARCH ARTICLE

# Random support vector machine cluster analysis of resting-state fMRI in Alzheimer's disease

Xia-an Bi\*, Qing Shu, Qi Sun, Qian Xu

College of Information Science and Engineering, Hunan Normal University, Changsha, P.R. China

\* [bixiaan@hnu.edu.cn](mailto:bixiaan@hnu.edu.cn)

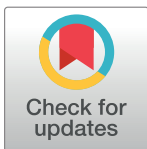

## Abstract

Early diagnosis is critical for individuals with Alzheimer's disease (AD) in clinical practice because its progress is irreversible. In the existing literature, support vector machine (SVM) has always been applied to distinguish between AD and healthy controls (HC) based on neuroimaging data. But previous studies have only used a single SVM to classify AD and HC, and the accuracy is not very high and generally less than 90%. The method of random support vector machine cluster was proposed to classify AD and HC in this paper. From the Alzheimer's Disease Neuroimaging Initiative database, the subjects including 25 AD individuals and 35 HC individuals were obtained. The classification accuracy could reach to 94.44% in the results. Furthermore, the method could also be used for feature selection and the accuracy could be maintained at the level of 94.44%. In addition, we could also find out abnormal brain regions (inferior frontal gyrus, superior frontal gyrus, precentral gyrus and cingulate cortex). It is worth noting that the proposed random support vector machine cluster could be a new insight to help the diagnosis of AD.

## OPEN ACCESS

**Citation:** Bi X-a, Shu Q, Sun Q, Xu Q (2018) Random support vector machine cluster analysis of resting-state fMRI in Alzheimer's disease. PLoS ONE 13(3): e0194479. <https://doi.org/10.1371/journal.pone.0194479>

**Editor:** Stephen D. Ginsberg, Nathan S Kline Institute, UNITED STATES

**Received:** October 3, 2017

**Accepted:** March 5, 2018

**Published:** March 23, 2018

**Copyright:** © 2018 Bi et al. This is an open access article distributed under the terms of the [Creative Commons Attribution License](https://creativecommons.org/licenses/by/4.0/), which permits unrestricted use, distribution, and reproduction in any medium, provided the original author and source are credited.

**Data Availability Statement:** All relevant data are within the paper and its Supporting Information files.

**Funding:** This work is supported by the National Science Foundation of China (No. 61502167). The funder had no role in study design, data collection and analysis, decision to publish, or preparation of the manuscript.

**Competing interests:** The authors have declared that no competing interests exist.

## Introduction

Alzheimer's disease (AD) belongs to the central neurodegenerative disorders, which is featured with insidious onset and the progressive course of chronic [1]. The progress of AD is irreversible, however, early treatment with AD could alter the impact of the disease [2], such as slow or delay the disease process [3, 4]. Therefore, early diagnosis is critical in clinical practice. Magnetic Resonance Imaging (MRI) has been widely used to diagnose AD [5, 6]. As the resting-state functional magnetic resonance imaging (fMRI) is an often-used noninvasive technique for detecting brain activities and is more simple-economical [7], it has been widely employed to diagnose AD [8].

Machine learning is an effective tool, and able to extract information from functional magnetic resonance imaging (fMRI) data and predict pathology progression [9, 10]. In a number of machine learning methods, the classification method is particularly useful in AD pathology [11]. Support vector machine (SVM) is considered to be one of the best classification methods in machine learning [12]. Compared with other methods such as decision trees and Bayesian

networks, SVM has obvious advantages such as the high accuracy [13], elegant mathematical tractability [14], and direct geometric interpretation [15]. In addition, SVM does not require a lot of training samples to avoid overfitting [16]. Therefore, SVM has drawn the attentions of researchers in the neuroimaging field and has been used to extract meaningful information from high-dimensional fMRI data [10, 17].

In recent years, support vector machine has been used in the study of disease classification. Jongkreangkrai et al. (2016) used the SVM to classify AD and HC based on the features of hippocampus and amygdaloid volume [18]. Zhan et al. (2015) applied multimodal support vector machine to identify the conversion from HC to MCI or AD by using MRI and positron emission tomography (PET) data, and the results showed that using multimodal data was significantly better than using a single modality [19]. As mentioned above, SVM is shown to be featured with high performance in classification. Beheshti et al. (2016) made SVM as a classifier and used the structural MRI data as features, and the classification accuracy of AD and HC was up to 92.48% [20]. Wotschel et al. (2015) employed support vector machine to predict the occurrence of clinical isolation syndrome (CIS) in the second clinical attack, and the SVM correctly predicted the presence (or the absence) in 71.4% of patients at 1 year, and in 68% at 3 years [21]. Valli et al. (2016) used structural MRI data as features of support vector machines for distinguishing patients who suffered from high risk of psychosis with accuracy of 72% ( $p < 0.001$ ) [22]. Retico et al. (2015) applied support vector machine and recursive feature elimination to identify AD based on whole grey matter, and the classification performance reached to  $AUC = (88.9 \pm 0.5)\%$  in 20-fold cross-validation on the AD/HC dataset [11]. Zhang et al. (2015) regarded the discriminate regions that distinguished AD from HC as features of support vector machine based on 3 kinds of kernels among which the polynomial kernel showed the highest average accuracy of 92.36% [12]. By employing a stack automatic encoder and a feature representation based on deep learning, the accuracy of AD diagnosis reaches to 95.9% [23].

Previous studies have consistently used a single SVM to classify AD and HC, and the classification effect is often not ideal. The classification accuracy is not very high and generally less than 90%. In this paper, a random SVM cluster is proposed and used to distinguish AD from HC, and the accuracy is up to 94.44%. Although the accuracy is not the highest, it is relatively high. In addition, when the number of SVMs is 370, the accuracy of the random SVM cluster could be stabilized at 90%, which fully shows that the random SVM cluster has a good classification performance. It is worth mentioning that we could find out the optimal feature set to effectively distinguish between AD patients using and HC without all the features, and the accuracy could be as high as 94.44%. By employing the random SVM cluster, the abnormal brain regions such as inferior frontal gyrus (orbital part) could also be found out. Thus the random support vector machine cluster provides a new insight into the diagnosis of AD.

## Materials and methods

### Ethics statement

The ADNI study was approved by Institutional Review Board (IRB) of each participating site, these are the Banner Alzheimer's Institute, Case Western Reserve University, Emory University, University of South Florida, Tampa, University of Rochester Medical Center, Washington University, St. Louis, Rhode Island Hospital, Georgetown University, Premiere Research Institute, Cleveland Clinic Lou Ruvo Center for Brain Health, University of Kentucky, Yale University School of Medicine, University of Alabama, Birmingham, Northwestern University, Ohio State University, Albany Medical College, St. Joseph's Health Center—Cognitive Neurology, Brigham and Women's Hospital, New York University Medical Center, Mount Sinai School of

Medicine, Dent Neurologic Institute, McGill University / Jewish General Hospital Memory Clinic, University of California, San Francisco, Medical University of South Carolina, University of California, San Diego, University of Kansas, Oregon Health & Science University, Stanford University, University of California, Davis, University of Michigan, Ann Arbor, Wake Forest University Health Sciences, University of Texas, Southwestern MC, Rush University Medical Center, University of California, Los Angeles, University of Southern California, Johns Hopkins University, Indiana University, Banner Sun Health Research Institute, Parkwood Hospital, Boston University, Mayo Clinic, Jacksonville, Nathan Kline Inst. for Psychiatric Rsch, University of Pittsburgh, Duke University Medical Center, Baylor College of Medicine, Wien Center for Clinical Research, Dartmouth Medical Center, University of British Columbia, Clinic for AD & Related, Mayo Clinic, Rochester, University of California, Irvine, Sunnybrook Health Sciences Centre, Butler Hospital Memory and Aging Program, University of Wisconsin, University of Pennsylvania, University of California, Irvine (BIC), University of Iowa, Howard University, Columbia University. All ADNI subjects together with their legal representatives should have written informed consent before collecting clinical, genetic and imaging data.

## Subjects

Our experimental data was acquired from the Alzheimer's Disease Neuroimaging Initiative (ADNI) (<http://adni.loni.usc.edu/>) database, which includes AD individuals and HC. There are various neuroimaging data including fMRI images.

First of all, the selected data should ensure that each subject has resting-state fMRI data. Secondly, each subject should have mini-mental state examination (MMSE) scores and clinical dementia rating (CDR) scores to ensure that the data is homologous. Finally, 25 AD patients and 36 HC are selected out on the basis of the above criteria.

## Data acquisition

The 3.0-T Philips Medical Systems MRI scanner was used to acquire fMRI images. In the scanning process, the subjects were required to relax, do not think and lying in the scanner. Sequence parameters were as follows: pulse sequence = GR, TE = 30ms, TR = 3000ms, flip angle = 80degree, data matrix = 64\*64, pixel spacing X = 3.31mm, pixel spacing Y = 3.31mm, slice thickness = 3.3mm, no slice gap, axial slices = 48, time points = 130.

## Data preprocessing

As the signal-to-noise ratio of the fMRI image is not high, the collected data need to be preprocessed to decrease the impact of noise on the functional magnetic resonance image. The Data Processing Assistant for Resting-State fMRI (DPARSF) software ([http://d.rnet.co/DPABI/DPABI\\_V2.3\\_170105.zip](http://d.rnet.co/DPABI/DPABI_V2.3_170105.zip)) was employed to preprocess all collected resting-state fMRI data. For each subject, the whole preprocessing process is divided into 9 steps, details are as follows: converting DICOM format into NIFTI format; removing the first 10 time points; slicing timing; realigning; normalizing the functional images into the echo-planar imaging (EPI) template; smoothing by the full width half maximum (FWHM); removing the linear trend to eliminate the residual noise that systematically increases or decreases as time goes by [24]; temporal filtering to retain 0.01–0.08 Hz fluctuation; removing covariates to eliminate the impacts of physiological artifacts [25, 26], non-neuronal blood oxygen level dependent (BOLD) fluctuations and head motion [27].

## Sample feature of subjects

After completing a series of data preprocessing steps as mentioned above, we began to determine the sample feature. This paper used the functional connectivity as the sample feature, and the following is the process of the feature.

Firstly, the images were divided into 90 brain regions (45 in each hemisphere) in the light of the Automatic Anatomical Labeling (AAL). Then, the time series of each region are obtained. Next, the Pearson correlation coefficient of every two regions is calculated. Lastly, 4005 ( $90 \times 89 / 2$ ) functional connections could be obtained as the subsequent experimental feature.

## The random SVM cluster

In the neuroimaging, there are many features that can be extracted. For instance, the gray matter volume [28] and cortical thickness [29] can be extracted as features of structural MRI data, and the functional connectivity [30] can be extracted as features of fMRI data. Functional connectivity of the brain is generally extracted as the feature in the traditional application of SVM based on fMRI data. Thus each subject has 4005 functional connections, which is regarded as the high-dimensional feature [31]. In the existing literature, there is a default method to handle the high-dimensional feature, that is, reducing the redundant features and then building the model [32, 33]. There are many methods to remove redundant features, and each method has its own advantages and disadvantages [34]. It is undeniable that directly removing redundant features is a relative straightforward method and has the advantage of speeding up computation as well as improving performance, but it would also lead to the loss of some information to some extent [35].

In this paper, a new random support vector machine cluster is proposed to randomly select the samples and the features to establish multiple SVMs. The random SVM cluster is combined by these SVMs and used for classification and feature selection. This method achieves the purpose of dimension reduction to a certain extent and also has good classification performance.

**The design and classification accuracy of the random SVM cluster.** In the neuroimaging, the number of features is generally numerous. The traditional approach to dealing with the high-dimensional feature has some limitations, and thereby a new approach called random SVM cluster is proposed in this paper. The detailed process is as follows.

Firstly, we randomly divide the sample set  $N$  into three components. They are the training set  $N_1$ , the test set  $N_2$  and the validation set  $N_3$ , where  $N = N_1 + N_2 + N_3$ . In each time,  $n$  samples are randomly selected from the training set  $N_1$  and  $d$  dimensional feature is randomly selected from the 4005 dimensional sample feature. A single SVM is formed by the selected samples and features. The process is repeated for  $k$  times and  $k$  SVMs are finally formed which are used to construct a random SVM cluster. Fig 1 shows the design of the random SVM cluster. After constructing a random SVM cluster, we use test set  $N_2$  to optimize parameters.

Since each SVM is set up by selecting part of the features randomly, it is quite effective in dealing with high-dimensional feature data. Since samples and features of each SVM are selected randomly, each SVM is different. In other words, the SVMs are featured with diversity which makes the random SVM cluster have a good generalization performance.

When a new sample arrives, the  $k$  SVMs respectively categorize the new sample and then the majority of votes is used to predict the category of the new sample. Similarly, we predict the category of each sample in the validation set  $N_3$  based on the random SVM cluster. Then we compare the predicted category with the real category to judge whether they are consistent, and count the number of consistent situations which is denoted by  $N_c$ . The accuracy of the random SVM cluster equals to  $N_c/N_3$ .

**Extracting features from the random SVM cluster.** As the selected features of each SVM are different, they have distinct performances. In this paper, the accuracy of SVM is used as a

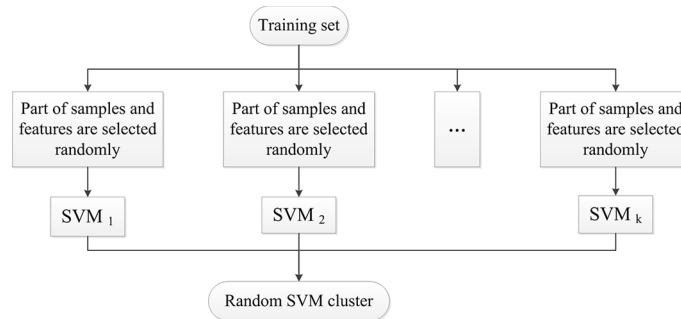

**Fig 1. The design of the random SVM cluster.**

<https://doi.org/10.1371/journal.pone.0194479.g001>

criterion to evaluate the quality of selected features. The features that make a significant contribution to the accuracy of SVM are called the "important features".

The specific approach of selecting "important features" is as follows. Firstly, we predict the accuracy of each SVM in the random SVM cluster and sort their accuracy from the largest to the smallest. Secondly, we extract the features used in SVM with high accuracy to form a feature matrix. Lastly, the frequency of each feature in the feature matrix is counted and the features with the higher frequency are referred as the "important features". Fig 2 shows the process of selecting "important features".

It is referred that the important features have great contributions to the accuracy of SVM, thus they also contributions to the accuracy of the random SVM cluster. As the important features distinguishingly contribute to the accuracy, we select features which are more important to the accuracy of the random SVM cluster from important features and these features are called the optimal feature set. The accuracy of the random SVM cluster is used as the criterion to find the optimal feature set.

**The abnormal brain regions.** As mentioned above, the optimal feature set has the greatest contribution to the accuracy of the random SVM cluster, so it could be regarded as the significant difference between AD and HC. In this paper, we make the optimal feature set as the abnormal functional connectivity. As functional connectivity is associated with two brain regions, the corresponding brain regions are the abnormal brain regions. We use the weight to denote the abnormal degree. The bigger the weight is, the more abnormal the brain region is. The weight of each region can be assessed by the number of regions associated with functional

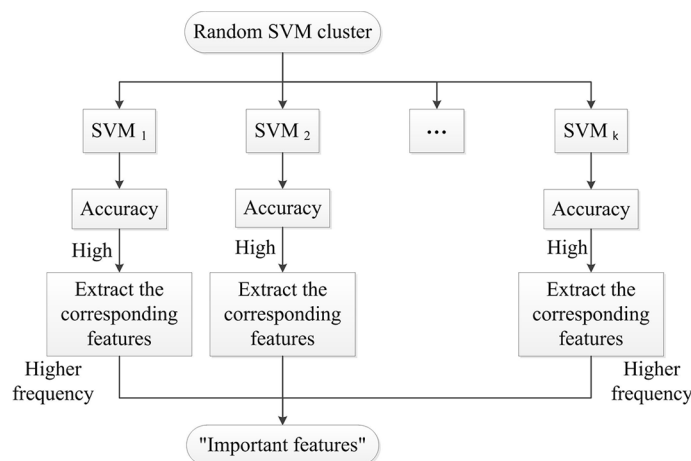

**Fig 2. Selecting "important features".**

<https://doi.org/10.1371/journal.pone.0194479.g002>

connections. In particular, if there is no functional connection associated with the brain region, the weight of the brain region is 0.

## Experiment design

In this paper, the experiment is divided into five parts:

1. Building a random SVM cluster with 500 SVMs. 60 samples are divided into 40 training samples, 2 testing samples and 18 validation samples. The number of selected features and selected samples is  $\sqrt{4005} \approx 62$  and 40 respectively. Each SVM uses Radial Basis Function (RBF) as kernel which is provided by the SVM toolbox (<http://see.xidian.edu.cn/faculty/chzheng/bishe/indexfiles/indexl.htm>).
2. Finding the optimal number of SVMs. In the above step, we subjectively make 500 as the number of SVMs, but it is not clear whether 500 is appropriate, which remains to be checked. Therefore, the aim of this step is to define the optimal number of SVMs. Firstly, we change the number of SVMs from 5 to 600, and then calculate the accuracy of the random SVM cluster with different number of SVMs. The number of SVMs corresponding to the random SVM cluster with the highest accuracy is optimal.
3. Selecting "important features". In this step, we make 0.75 as a criterion for high accuracy and select 400 features with higher frequency as "important features" which is used to find the optimal feature set. In addition, the "important features" are arranged in frequency from high to low.
4. Finding the optimal feature set. In the first step, we select 62 features from 4005 functional connections features to build the random SVM cluster. But in this step, we select 62 features from "important features" to build the random SVM cluster. In order to find the optimal number of "important features", we change the number from 70 to 400. In short, the number of selected features which are used to build the random SVM is always 62. However, the number of total features drops to 400 "important features" from the beginning of 4005 functional connections features. Then we calculate the accuracy of the random SVM cluster with different number of total features, and the number of total features corresponding to the random SVM cluster with the highest accuracy is optimal.
5. Finding the abnormal brain region. According to the optimal feature set, we could obtain the weight of each brain region.

## Results

### The basic characteristics of participants

After the preprocessing, the head moving parameters are needed to be checked. The data of one HC cannot be included in the subsequent analysis because the translation exceeded  $\pm 2$ mm or rotation surpassed  $\pm 2$  degrees. The chi-square test is applied in assessing gender differences between AD group and HC group, and age differences are assessed by the two-sample *t* test. [Table 1](#) shows the detail results. It is indicated that no obvious gender difference ( $p = 0.693$ ) and age difference ( $p = 0.168$ ) exists in these two groups.

### The accuracy of the random SVM cluster

After the parameter adjustment of the test set, the related parameters are adjusted as follows: cost parameter equals to Inf and width parameter gamma of RBF equals to 3.



**Table 1. Basic characteristics of AD and HC.**

| Variables (Mean ± SD) | AD (n = 25) | HC (n = 35) | P value |
|-----------------------|-------------|-------------|---------|
| Gender (M/F)          | 12/13       | 15/20       | 0.693   |
| Age (years)           | 74.59±7.03  | 77.09±6.69  | 0.168   |

Abbreviations: AD, Alzheimer's disease; HC, healthy control

<https://doi.org/10.1371/journal.pone.0194479.t001>

As a random SVM cluster consists of many SVMs, we use 500 SVMs to build a random SVM cluster. As shown in Fig 3, about half of the single SVM's accuracy ranges from 0.6 to 0.78 and the average accuracy of these 500 SVMs is only about 0.65. Although the accuracy of a single SVM is not high, the accuracy of the random SVM cluster is as high as 94.44%. It is inferred that the random SVM cluster could compensate for the instability and low accuracy of a single classifier.

### The optimal number of SVMs and the optimal feature set

Fig 4(A) shows the different levels of accuracy when the number of SVMs changes. As the number of SVMs rises to 370, the accuracy of the random SVM cluster begins to stabilize and fluctuates around the level of 90%. Therefore, 370 is regarded as the optimal number of SVMs in this paper, and the follow results are obtained on the 370 SVMs. Fig 4(B) shows the optimal feature set. When we make the first 170 features as the sample feature of the random SVM cluster, the accuracy of the random SVM cluster reaches to the highest and the accuracy is 94.44%. Therefore, the first 170 features are the optimal feature set.

### The abnormal brain regions

Fig 5 displays the distribution of 170 functional connections. The line represents the functional connectivity and the point represents the brain region. The sagittal, axial and coronal positions of the brain are respectively shown in Fig 5A, Fig 5B and Fig 5C.

The 170 functional connections help to find the abnormal brain regions. The weight of each region is obtained by the number of regions associated with the 170 functional

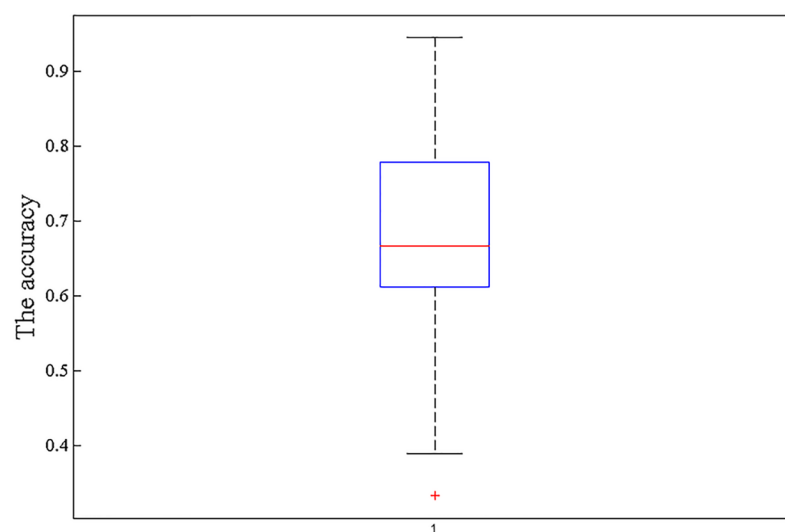

**Fig 3. The accuracy of 500 SVMs.**

<https://doi.org/10.1371/journal.pone.0194479.g003>

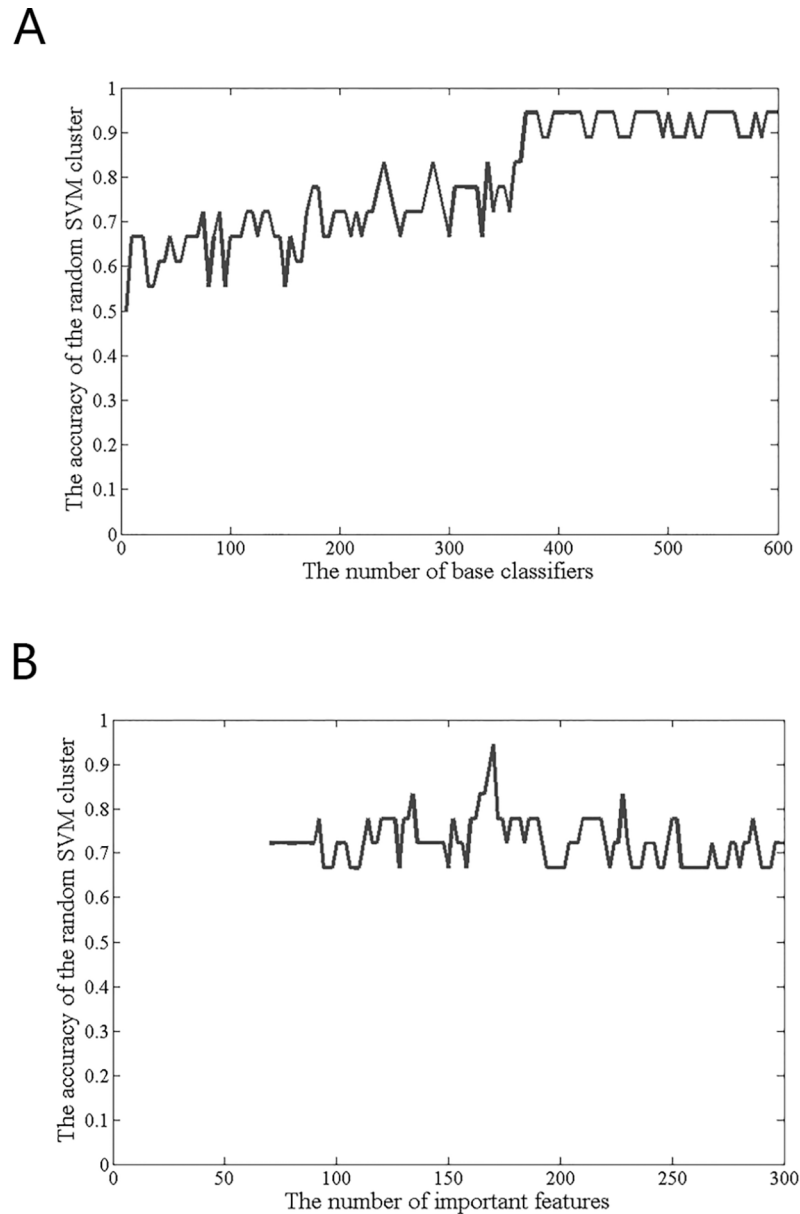

**Fig 4. The optimal number of SVMs and optimal feature set.**

<https://doi.org/10.1371/journal.pone.0194479.g004>

connections. Fig 6 displays the weight of each brain region, and the size of the point represents the size of the brain weight. The specific weight values of some brain regions are shown in Table 2. The regions with the greater weight included the left orbital part of inferior frontal gyrus (ORBinf.L), the left superior frontal gyrus, dorsolateral (SFGdor.L), the right orbital part of inferior frontal gyrus (ORBinf.R), the right medial orbital of superior frontal gyrus (ORB-supmed.R), the left precentral gyrus (PreCG.L), the left triangular part of inferior frontal gyrus (IFGtriang.L), the right medial of superior frontal gyrus (SFGmed.R), the right anterior cingulate and paracingulate gyri (ACG.R), the left median cingulate and paracingulate gyri (DCG.L), the left calcarine fissure and surrounding cortex (CAL.L). We can learn from Table 2 that ORBinf.L has the largest weigh. Fig 7 shows the functional connectivity between ORBinf.L and other brain regions.



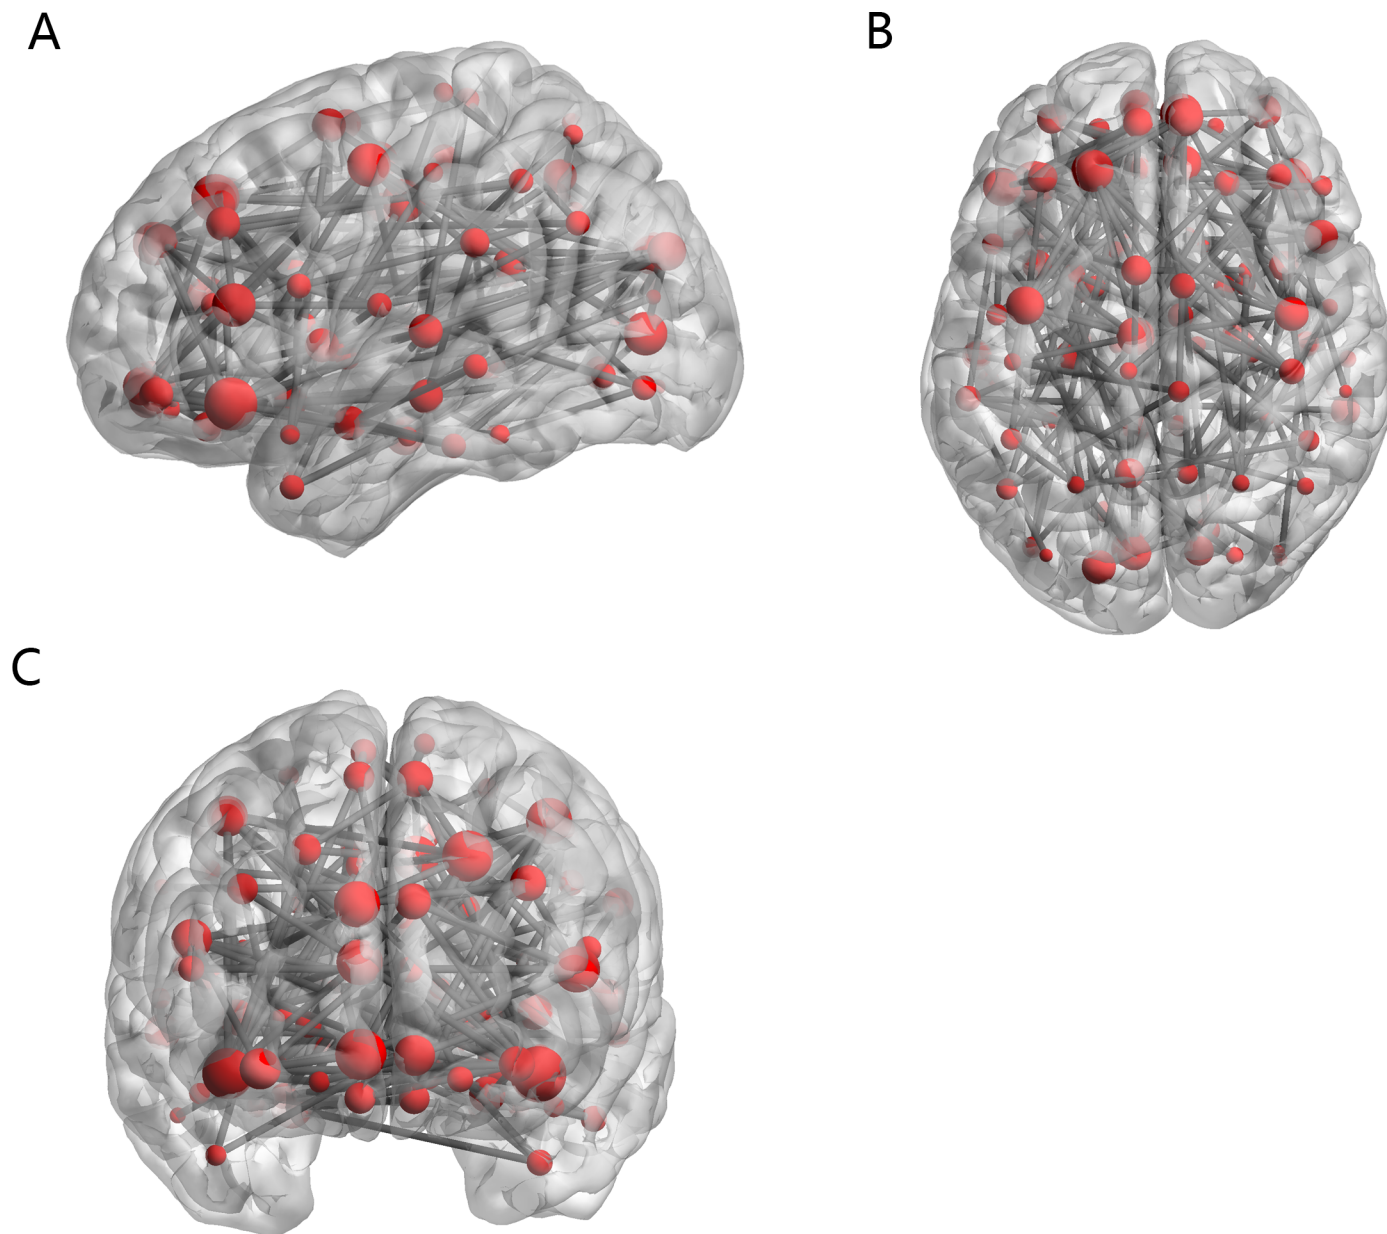

**Fig 5. The distribution of 170 functional connections.**

<https://doi.org/10.1371/journal.pone.0194479.g005>

## Discussion

### The performance of the random SVM cluster

In recent years, various predictive models have been employed to classify AD. Bayesian data mining with ensemble learning was used to distinguish AD and MCI and the accuracy was 81% [36]. Devanand et al. (2007) used the logistic regression model and the Cox proportional hazards model to identify mild cognitive impairment (MCI) and AD with accuracy of 83.3% [37]. Möller et al. (2015) used the gray matter density as feature and SVM as classifier to classify AD and HC, and the accuracy was 85% [38]. Chen et al. (2011) used large-scale network (LSN) analysis to classify AD and HC, and the accuracy was 87% [39]. Zhang et al. (2015)

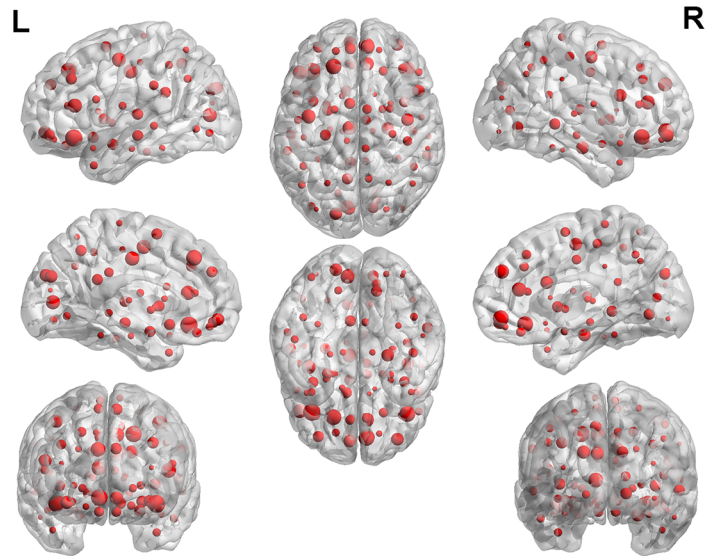

**Fig 6. The weight of 90 brain regions.**

<https://doi.org/10.1371/journal.pone.0194479.g006>

regarded the discriminate regions that distinguished AD from HC as features of support vector machine based on 3 kinds of kernels among which the polynomial kernel showed the highest average accuracy of 92.36% [12]. Beheshti et al. (2016) made SVM as a classifier and used the structural MRI data as features, and the classification accuracy of AD and HC was up to 92.48% [20]. By employing a stack automatic encoder and a feature representation based on deep learning, the accuracy of AD diagnosis reaches to 95.9% [23].

In this paper, a random SVM cluster is proposed and used to distinguish AD from HC, and the accuracy is up to 94.44%. Although the accuracy is not the highest, it is relatively high. In addition, when the number of SVMs is 370, the accuracy of the random SVM cluster could be stabilized at 90%, which fully shows that the random SVM cluster has a good classification performance. It is worth mentioning that we could find out the optimal feature set to effectively distinguish between AD patients using and HC without all the features, and the accuracy could be as high as 94.44%.

### Analysis of brain regions with greater weight

The results of this study show that the abnormal functional connectivity of AD compared with HC are mainly concentrated in frontal lobe and cingulate cortex. The frontal lobe and cingulate gyrus are the mainly regions of pathological changes in AD late stage [40, 41]. This shows that the abnormal brain regions which are found out by this study are consistent with the pathology progression of AD. Detailed analyses of the abnormal brain regions are conducted in the following.

**Table 2. The higher weight of brain regions.**

| Weight | Region                                                      |
|--------|-------------------------------------------------------------|
| 9      | ORBinf.L                                                    |
| 8      | SFGdor.L ORBinf.R ORBsupmed.R                               |
| 7      | PreCG.L IFGtriang.L SFGmed.R ACG.R DCG.L CAL.L              |
| 6      | PreCG.R ORBmid.R IFGperc.R ORBsupmed.L<br>PHG.R CUN.L SOG.L |

<https://doi.org/10.1371/journal.pone.0194479.t002>

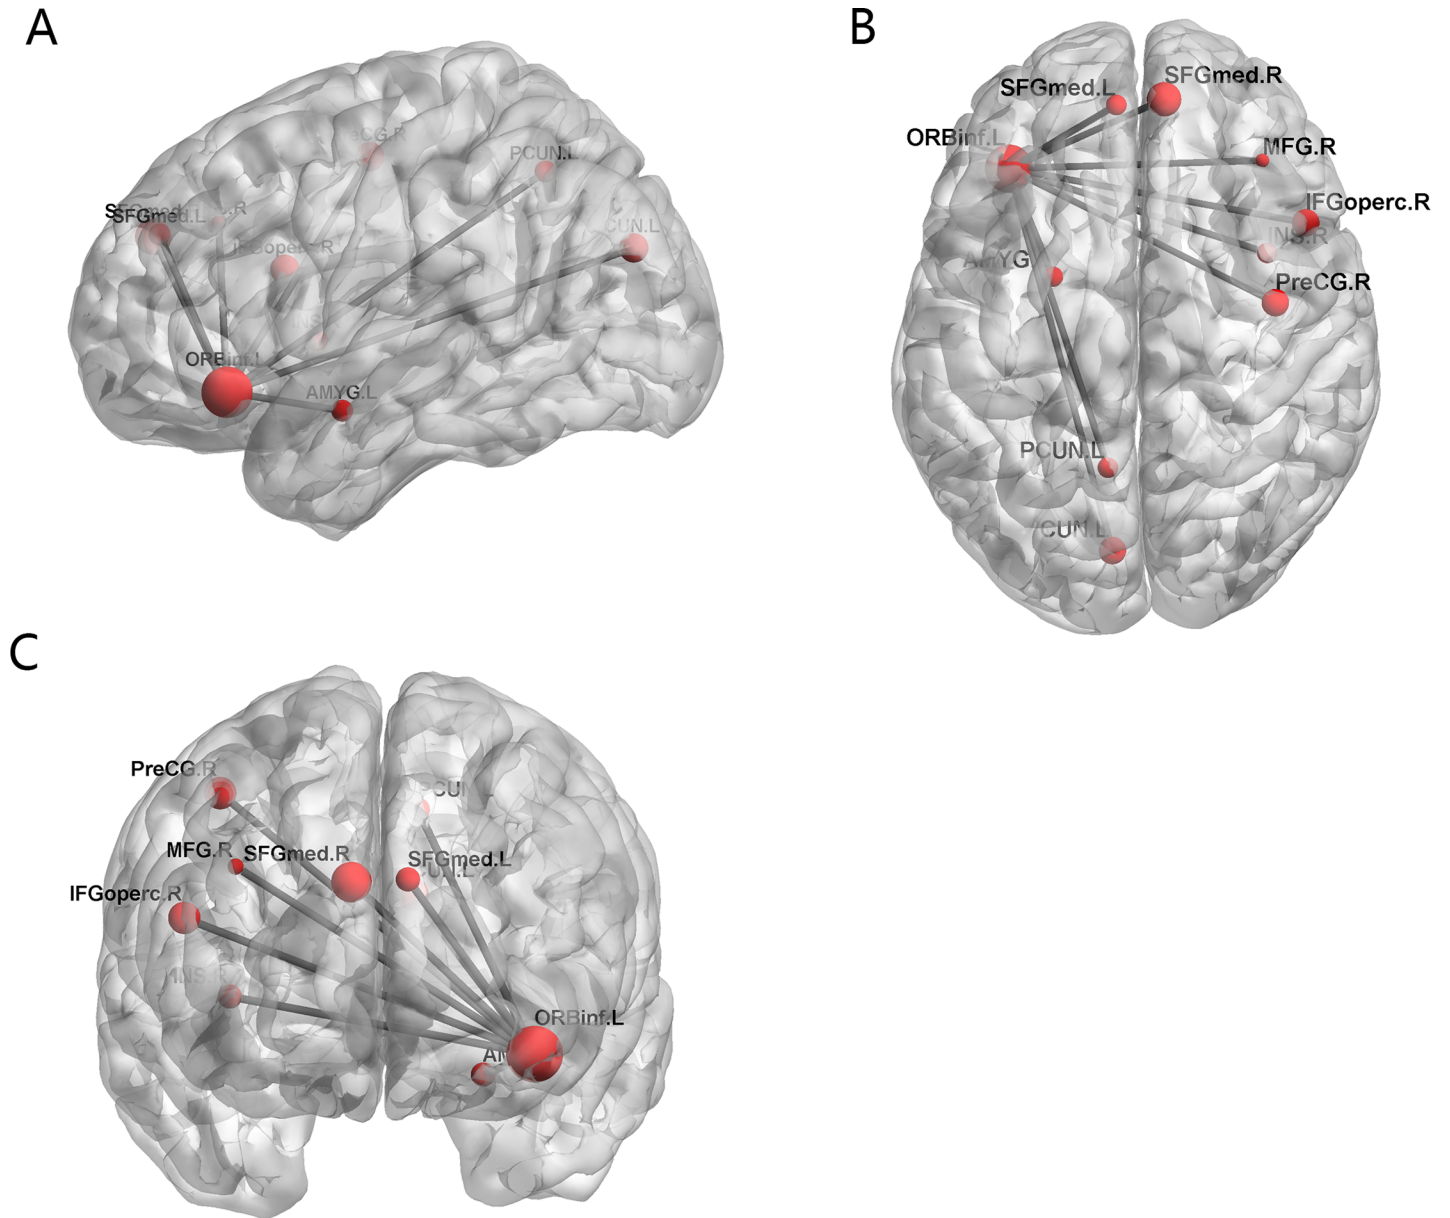

**Fig 7. The functional connectivity between ORBinf.L and other brain regions.**

<https://doi.org/10.1371/journal.pone.0194479.g007>

(1) Orbitofrontal Cortex

In this study, we found that the weight of frontal gyrus (left orbital part) in all abnormal brain regions was the largest. It is indicated that the frontal gyrus contribute to classification of the random SVM cluster.

Orbitofrontal cortex and amygdala have long been considered to be a region which regulate changes in behavior, especially those that are guided by changes in the reward environment [42, 43]. Lesions of orbitofrontal cortex affect the reversal study in primates and rodents [44, 45]. Orbitofrontal cortex is part of the prefrontal cortex (PFC) which is important for flexible response to change environmental contingencies [46]. Thus, the orbital part may be involved in the prediction of the event and the past experience evaluation [47]. Rosenberg et al. (2015)

pointed out that orbitofrontal cortex was associated with apathy in AD [48]. Nestor et al. (2015) provided evidence that orbitofrontal cortex gray matter had a unique contribution to intelligence [49].

Previous studies of Alzheimer's disease have concluded that the orbitofrontal cortex is abnormal. Woodward et al. (2015) found that orbitofrontal hypometabolism was greater in AD patients [50]. Cavado et al. (2016) found that cortical thinning of left orbitofrontal cortex as well as anterior cingulate cortex (ACC) decreased significantly in AD patients [51]. Nakaaki et al. (2013) found that gray matter volume decreased in right ACC, posterior cingulate cortex (PCC) and orbitofrontal cortex in AD patients [52]. This fully demonstrates that the results of this paper are consistent with previous studies.

The abnormal connectivity of the orbitofrontal cortex with other brain regions is likely to lead to social cognitive degradation, memory loss, apathy, etc. in AD patients. Our experiments show that orbitofrontal cortex is significantly abnormal and the results provide a great help for the clinical diagnosis and treatment of Alzheimer's disease.

### (2) Superior frontal gyrus (SFG)

In this study, we found that the weight of the superior frontal gyrus in the abnormal brain regions was relatively larger than others. It is manifested that the SFG contribute to classification of the random SVM cluster.

Hu et al. (2016) showed that activation of the right superior frontal gyrus was associated with more efficient reaction suppression and less motor urgency [53]. Changed functional connectivity and cortical thickness of the SFG was associated with impulsive responses in patients with posttraumatic stress disorders [54]. The right SFG has a specific role in actively controlling the impulsive responses [55, 56].

In the plentiful studies of AD, the superior frontal gyrus has been found to be abnormal. Zhang et al. (2015) detected 30 AD-related brain regions such as SFG, precentral gyrus, cingulate gyrus [12]. dos Santos Tascone et al. (2017) found that gray matter volume of the AD subgroup with few neuropsychiatric symptoms obviously reduced in the right SFG and the left ACC [57]. Wang et al. (2015) found that grey matter (GM) of AD group in right fusiform gyrus and right superior frontal gyrus decreased [58]. This demonstrates that our findings are coherent with existing literatures.

The abnormal connectivity of the superior frontal gyrus with other brain regions is likely to lead to impulsive responses in AD patients. This result contributes to the clinical diagnosis and treatment of AD.

### (3) Precentral gyrus

In this study, we found that the weight of the precentral gyrus in the abnormal brain regions was relatively larger than others. This shows that the precentral gyrus also plays a critical role in the classification of the random SVM cluster.

Existing literature points out that precentral gyrus activation may be associated with the motor demands [59]. The activation of left precentral gyrus reflects the sensory motor control of the mouth, tongue and pharynx in expressing language activities [60]. Recently, a meta-analysis of cerebral activations exposed that the left precentral gyrus was more activated when reading nonwords compared with words during single word reading in fluent adult readers [61].

Existing literature of Alzheimer's disease has pointed out that the precentral gyrus is abnormal. Zhang et al. (2015) proposed a new method to detect 30 AD-related brain regions such as anterior cingulate, precentral gyrus [12]. Wang et al. (2016) detected 17 regions related to AD such as postcentral gyrus, precentral gyrus and cingulate gyrus by using the pure computer-vision technique [62]. Nishida et al. (2015) found that beta 2 connectivity slightly declined between right parahippocampal gyrus and right precentral gyrus in AD patients [63]. Guo et al. (2016) showed that the connectivity between the precentral gyrus to the middle cingulum



and supplementary motor area decreased in AD patients with depression compared with non-depressed AD [64]. This illustrates that the results of this study are coherent with existing literatures.

The abnormal connectivity of the precentral gyrus with other brain regions may lead to language impairment in AD patients. This result could improve the clinical diagnosis and treatment of Alzheimer's disease.

#### (4) Cingulate cortex

We found that the weight of the cingulate cortex in the abnormal brain regions was comparatively larger than others in this study. This shows that the cingulate cortex plays a decisive role in the classification of the random SVM cluster.

The anterior cingulate cortex (ACC) could have an essential role in pain processing and pain-gating at the cortical level [65]. The anterior cingulate cortex (ACC) participates in regulating cognitive and emotional behavior. If the ACC is damaged, it may result in personality changes, impulses, and social behavior impairment [66].

In the abundant studies of Alzheimer's disease, researchers have discovered that the cingulate cortex is abnormal. Landin-Romero et al. (2017) found that the PCC cortex in AD patients has larger atrophy than behavioural-variant frontotemporal dementia (bvFTD) individuals [67]. Huey et al. (2017) found that posterior cingulate cortex had atrophy in AD patients and this brain area was also independent of apathy [68]. dos Santos Tascone et al. (2017) found that gray matter volume of the AD subgroup with few neuropsychiatric symptoms obviously reduced in the right SFG and the left ACC [57]. Wang et al. (2013) found that compared to HC, the structural interaction between right inferior parietal cortex and PCC increased in the AD patients [69]. This displays that the results of this study are coherent with existing literatures.

The cingulate cortex abnormalities can be seen as the mark of Alzheimer's disease and it is probably to cause cognitive impairment in AD patients. This result could promote the clinical diagnosis and treatment of AD.

Our study contributes to introducing the random SVM cluster method to analyze fMRI data of AD and HC. This model has a good classification performance and its classification accuracy reaches to 94.44%. However, it also has several limitations. Firstly, the functional connectivity used in the study was established at the brain level, and future studies could use functional connectivity at voxel level. Secondly, although this study could have an excellent result only by using the functional connectivity as features, in the future studies we could improve the random SVM cluster classification performance by integrating the functional connectivity and other imaging modality measurements. Finally, in order to recognize AD earlier, it is suggested to detect early stages of AD such as mild cognitive impairment, as well as predicting future cognitive decline from functional connectivity measures in future studies.

## Supporting information

**S1 Table. The feature of 60 participants in the experiment.**  
(XLSX)

## Acknowledgments

This work is supported by the National Science Foundation of China (No. 61502167)

## Author Contributions

**Conceptualization:** Xia-an Bi.

**Data curation:** Xia-an Bi, Qian Xu.

**Formal analysis:** Xia-an Bi.

**Funding acquisition:** Xia-an Bi.

**Investigation:** Xia-an Bi.

**Methodology:** Xia-an Bi.

**Project administration:** Xia-an Bi.

**Software:** Qian Xu.

**Supervision:** Xia-an Bi.

**Validation:** Qing Shu.

**Visualization:** Qi Sun.

**Writing – original draft:** Xia-an Bi.

**Writing – review & editing:** Xia-an Bi.

## References

1. Reynolds A. Alzheimer disease: focus on computed tomography. *Radiologic Technology*. 2013; 85(2):187CT–211CT. PMID: [24255154](#)
2. Thompson PM, Hayashi KM, Dutton RA, CHIANG MC, Leow AD, Sowell ER, et al. Tracking Alzheimer's disease. *Annals of the New York Academy of Sciences*. 2007; 1097(1):183–214.
3. Jack C, Slomkowski M, Gracon S, Hoover T, Felmler JP, Stewart K, et al. MRI as a biomarker of disease progression in a therapeutic trial of milameline for AD. *Neurology*. 2003; 60(2):253–60. PMID: [12552040](#)
4. Fox N, Black R, Gilman S, Rossor M, Griffith S, Jenkins L, et al. Effects of A $\beta$  immunization (AN1792) on MRI measures of cerebral volume in Alzheimer disease. *Neurology*. 2005; 64(9):1563–72. <https://doi.org/10.1212/01.WNL.0000159743.08996.99> PMID: [15883317](#)
5. Cuingnet R, Gerardin E, Tessieras J, Auzias G, Lehéricy S, Habert M-O, et al. Automatic classification of patients with Alzheimer's disease from structural MRI: a comparison of ten methods using the ADNI database. *neuroimage*. 2011; 56(2):766–81. <https://doi.org/10.1016/j.neuroimage.2010.06.013> PMID: [20542124](#)
6. Wolz R, Julkunen V, Koikkalainen J, Niskanen E, Zhang DP, Rueckert D, et al. Multi-method analysis of MRI images in early diagnostics of Alzheimer's disease. *Plos One*. 2011; 6(10):e25446. <https://doi.org/10.1371/journal.pone.0025446> PMID: [22022397](#)
7. Greicius M. Resting-state functional connectivity in neuropsychiatric disorders. *Current opinion in neurology*. 2008; 21(4):424–30. <https://doi.org/10.1097/WCO.0b013e328306f2c5> PMID: [18607202](#)
8. Zhou B, Liu Y, Zhang Z, An N, Yao H, Wang P, et al. Impaired functional connectivity of the thalamus in Alzheimer's disease and mild cognitive impairment: a resting-state fMRI study. *Current Alzheimer Research*. 2013; 10(7):754–66. PMID: [23905993](#)
9. Klöppel S, Abdulkadir A, Jr CRJ, Koutsouleris N, Mouraomiranda J, Vemuri P. Diagnostic neuroimaging across diseases. *Neuroimage*. 2012; 61(2):457–63. <https://doi.org/10.1016/j.neuroimage.2011.11.002> PMID: [22094642](#)
10. Orrù G, Pettersson-Yeo W, Marquand AF, Sartori G, Mechelli A. Using Support Vector Machine to identify imaging biomarkers of neurological and psychiatric disease: A critical review. *Neuroscience & Biobehavioral Reviews*. 2012; 36(4):1140–52.
11. Retico A, Bosco P, Cerello P, Fiorina E, Chincarini A, Fantacci ME. Predictive Models Based on Support Vector Machines: Whole-Brain versus Regional Analysis of Structural MRI in the Alzheimer's Disease. *Journal of Neuroimaging*. 2015; 25(4):552–63. <https://doi.org/10.1111/jon.12163> PMID: [25291354](#)
12. Zhang Y, Dong Z, Phillips P, Wang S, Ji G, Yang J, et al. Detection of subjects and brain regions related to Alzheimer's disease using 3D MRI scans based on eigenbrain and machine learning. *Frontiers in Computational Neuroscience*. 2015; 9(9):66.
13. Zhang Y, Wu L. Classification of Fruits Using Computer Vision and a Multiclass Support Vector Machine. *Sensors*. 2012; 12(9):12489–505. <https://doi.org/10.3390/s120912489> PMID: [23112727](#)

14. Carrasco M, López J, Maldonado S. A second-order cone programming formulation for nonparallel hyperplane support vector machine. *Expert Systems with Applications*. 2016; 54(C):95–104.
15. Wei Y, Watada J, Pedrycz W. Design of a qualitative classification model through fuzzy support vector machine with type-2 fuzzy expected regression classifier preset. *IEEJ Transactions on Electrical and Electronic Engineering*. 2016; 11(3):348–56.
16. Li D, Yang W, Wang S. Classification of foreign fibers in cotton lint using machine vision and multi-class support vector machine. *Computers & Electronics in Agriculture*. 2010; 74(2):274–9.
17. Sundermann B, Herr D, Schwindt W, Pfeleiderer B. Multivariate classification of blood oxygen level-dependent fMRI data with diagnostic intention: a clinical perspective. *American Journal of neuroradiology*. 2014; 35(5):848–55. <https://doi.org/10.3174/ajnr.A3713> PMID: 24029388
18. Jongkreangkrai C, Vichianin Y, Tocharoenchai C, Arimura H. Computer-aided classification of Alzheimer's disease based on support vector machine with combination of cerebral image features in MRI. *Journal of Physics: Conference Series*. 2016; 694(1):012036.
19. Zhan Y, Chen K, Wu X, Zhang D, Zhang J, Yao L, et al. Identification of conversion from normal elderly cognition to Alzheimer's disease using multimodal support vector machine. *Journal of Alzheimer's Disease*. 2015; 47(4):1057–67. <https://doi.org/10.3233/JAD-142820> PMID: 26401783
20. Beheshti I, Demirel H, Farokhian F, Yang C, Matsuda H, Initiative AsDN. Structural MRI-based detection of Alzheimer's disease using feature ranking and classification error. *Computer methods and programs in biomedicine*. 2016; 137:177–93. <https://doi.org/10.1016/j.cmpb.2016.09.019> PMID: 28110723
21. Wotschel V, Alexander D, Kwok P, Chard D, Stromillo M, De Stefano N, et al. Predicting outcome in clinically isolated syndrome using machine learning. *NeuroImage: Clinical*. 2015; 7:281–7.
22. Valli I, Marquand AF, Mechelli A, Raffin M, Allen P, Seal ML, et al. Identifying Individuals at High Risk of Psychosis: Predictive Utility of Support Vector Machine using Structural and Functional MRI Data. *Frontiers in Psychiatry*. 2016; 7:52. <https://doi.org/10.3389/fpsy.2016.00052> PMID: 27092086
23. Suk H-I, Shen D. Deep Learning-Based Feature Representation for AD/MCI Classification. *International Conference on Medical Image Computing and Computer-Assisted Intervention*. 2013:583–90. PubMed PMID: PMC4029347.
24. Lowe MJ, Russell DP. Treatment of baseline drifts in fMRI time series analysis. *Journal of computer assisted tomography*. 1999; 23(3):463–73. PMID: 10348457
25. Fransson P. Spontaneous low-frequency BOLD signal fluctuations: An fMRI investigation of the resting-state default mode of brain function hypothesis. *Human Brain Mapping*. 2005; 26(1):15–29. <https://doi.org/10.1002/hbm.20113> PMID: 15852468
26. Fox MD, Snyder AZ, Vincent JL, Corbetta M, Van Essen DC, Raichle ME. The human brain is intrinsically organized into dynamic, anticorrelated functional networks. *Proceedings of the National Academy of Sciences of the United States of America*. 2005; 102(27):9673–8. <https://doi.org/10.1073/pnas.0504136102> PMID: 15976020
27. Kelly AM, Uddin LQ, Biswal BB, Castellanos FX, Milham MP. Competition between functional brain networks mediates behavioral variability. *Neuroimage*. 2008; 39(1):527–37. <https://doi.org/10.1016/j.neuroimage.2007.08.008> PMID: 17919929
28. Beheshti I, Demirel H, Initiative AsDN. Feature-ranking-based Alzheimer's disease classification from structural MRI. *Magnetic resonance imaging*. 2016; 34(3):252–63. <https://doi.org/10.1016/j.mri.2015.11.009> PMID: 26657976
29. Qureshi MNI, Min B, Jo HJ, Lee B. Multiclass classification for the differential diagnosis on the ADHD subtypes using recursive feature elimination and hierarchical extreme learning machine: structural MRI study. *PloS one*. 2016; 11(8):e0160697. <https://doi.org/10.1371/journal.pone.0160697> PMID: 27500640
30. Plitt M, Barnes KA, Martin A. Functional connectivity classification of autism identifies highly predictive brain features but falls short of biomarker standards. *NeuroImage: Clinical*. 2015; 7:359–66.
31. Tang Y, Wang L, Cao F, Tan L. Identify schizophrenia using resting-state functional connectivity: an exploratory research and analysis. *Biomedical engineering online*. 2012; 11(1):50.
32. Wee C-Y, Yap P-T, Denny K, Browndyke JN, Potter GG, Welsh-Bohmer KA, et al. Resting-state multi-spectrum functional connectivity networks for identification of MCI patients. *PloS one*. 2012; 7(5): e37828. <https://doi.org/10.1371/journal.pone.0037828> PMID: 22666397
33. Liu F, Guo W, Fouche J-P, Wang Y, Wang W, Ding J, et al. Multivariate classification of social anxiety disorder using whole brain functional connectivity. *Brain Structure and Function*. 2015; 220(1):101–15. <https://doi.org/10.1007/s00429-013-0641-4> PMID: 24072164
34. Mwangi B, Tian TS, Soares JC. A review of feature reduction techniques in neuroimaging. *Neuroinformatics*. 2014; 12(2):229–44. <https://doi.org/10.1007/s12021-013-9204-3> PMID: 24013948



35. Dosenbach NU, Nardos B, Cohen AL, Fair DA, Power JD, Church JA, et al. Prediction of individual brain maturity using fMRI. *Science*. 2010; 329(5997):1358–61. <https://doi.org/10.1126/science.1194144> PMID: 20829489
36. Chen R, Young K, Chao L, Miller B, Yaffe K, Weiner M, et al. Prediction of conversion from mild cognitive impairment to Alzheimer disease based on Bayesian data mining with ensemble learning. *The neuroradiology journal*. 2012; 25(1):5–16. <https://doi.org/10.1177/197140091202500101> PMID: 24028870
37. Devanand DP, Pradhaban G, Liu X, Khandji A, De SS, Segal S, et al. Hippocampal and entorhinal atrophy in mild cognitive impairment: prediction of Alzheimer disease. *Neurology*. 2007; 68(11):828–36. <https://doi.org/10.1212/01.wnl.0000256697.20968.d7> PMID: 17353470
38. Möller C, Pijnenburg YA, van der Flier WM, Versteeg A, Tijms B, de Munck JC, et al. Alzheimer disease and behavioral variant frontotemporal dementia: automatic classification based on cortical atrophy for single-subject diagnosis. *Radiology*. 2015; 279(3):838–48. <https://doi.org/10.1148/radiol.2015150220> PMID: 26653846
39. Chen G, Ward BD, Xie C, Li W, Wu Z, Jones JL, et al. Classification of Alzheimer disease, mild cognitive impairment, and normal cognitive status with large-scale network analysis based on resting-state functional MR imaging. *Radiology*. 2011; 259(1):213–21. <https://doi.org/10.1148/radiol.10100734> PMID: 21248238
40. Luis CA, Loewenstein DA, Acevedo A, Barker WW, Duara R. Mild cognitive impairment Directions for future research. *Neurology*. 2003; 61(4):438–44. PMID: 12939414
41. Storandt M, Grant EA, Miller JP, Morris JC. Rates of progression in mild cognitive impairment and early Alzheimer's disease. *Neurology*. 2002; 59(7):1034–41. PMID: 12370458
42. Morrison SE, Saez A, Lau B, Salzman CD. Different time courses for learning-related changes in amygdala and orbitofrontal cortex. *Neuron*. 2011; 71(6):1127–40. <https://doi.org/10.1016/j.neuron.2011.07.016> PMID: 21943608
43. Rudebeck PH, Murray EA. Amygdala and orbitofrontal cortex lesions differentially influence choices during object reversal learning. *Journal of Neuroscience*. 2008; 28(33):8338–43. <https://doi.org/10.1523/JNEUROSCI.2272-08.2008> PMID: 18701696
44. Izquierdo A, Suda RK, Murray EA. Bilateral orbital prefrontal cortex lesions in rhesus monkeys disrupt choices guided by both reward value and reward contingency. *Journal of Neuroscience*. 2004; 24(34):7540–8. <https://doi.org/10.1523/JNEUROSCI.1921-04.2004> PMID: 15329401
45. Chudasama Y, Robbins TW. Dissociable contributions of the orbitofrontal and infralimbic cortex to pavlovian autoshaping and discrimination reversal learning: further evidence for the functional heterogeneity of the rodent frontal cortex. *Journal of Neuroscience*. 2003; 23(25):8771–80. PMID: 14507977
46. Miller EK, Cohen JD. An integrative theory of prefrontal cortex function. *Annual review of neuroscience*. 2001; 24(1):167–202.
47. Breiter HC, Aharon I, Kahneman D, Dale A, Shizgal P. Functional imaging of neural responses to expectancy and experience of monetary gains and losses. *Neuron*. 2001; 30(2):619–39. PMID: 11395019
48. Rosenberg PB, Nowrangi MA, Lyketsos CG. Neuropsychiatric symptoms in Alzheimer's disease: what might be associated brain circuits? *Molecular aspects of medicine*. 2015; 43:25–37. <https://doi.org/10.1016/j.mam.2015.05.005> PMID: 26049034
49. Nestor PG, Nakamura M, Niznikiewicz M, Levitt JJ, Newell DT, Shenton ME, et al. Attentional control and intelligence: MRI orbital frontal gray matter and neuropsychological correlates. *Behavioural neurology*. 2015; 2015:354186. <https://doi.org/10.1155/2015/354186> PMID: 26101457
50. Woodward MC, Rowe CC, Jones G, Villemagne VL, Varos TA. Differentiating the frontal presentation of Alzheimer's disease with FDG-PET. *Journal of Alzheimer's Disease*. 2015; 44(1):233–42. <https://doi.org/10.3233/JAD-141110> PMID: 25261443
51. Cavado E, Dubois B, Colliot O, Lista S, Croisile B, Tisserand GL, et al. Reduced regional cortical thickness rate of change in donepezil-treated subjects with suspected prodromal Alzheimer's disease. *The Journal of clinical psychiatry*. 2016; 77(12):e1631–e8. <https://doi.org/10.4088/JCP.15m10413> PMID: 27780331
52. Nakaaki S, Sato J, Torii K, Oka M, Negi A, Nakamae T, et al. Neuroanatomical abnormalities before onset of delusions in patients with Alzheimer's disease: a voxel-based morphometry study. *Neuropsychiatric disease and treatment*. 2013; 9:1–8. <https://doi.org/10.2147/NDT.S38939> PMID: 23293521
53. Hu S, Ide JS, Zhang S, Chiang-shan RL. The right superior frontal gyrus and individual variation in proactive control of impulsive response. *Journal of Neuroscience*. 2016; 36(50):12688–96. <https://doi.org/10.1523/JNEUROSCI.1175-16.2016> PMID: 27974616
54. Sadeh N, Spielberg JM, Miller MW, Milberg WP, Salat DH, Amick MM, et al. Neurobiological indicators of disinhibition in posttraumatic stress disorder. *Human brain mapping*. 2015; 36(8):3076–86. <https://doi.org/10.1002/hbm.22829> PMID: 25959594

55. Dambacher F, Sack AT, Lobbstaël J, Arntz A, Brugman S, Schuhmann T. The role of right prefrontal and medial cortex in response inhibition: interfering with action restraint and action cancellation using transcranial magnetic brain stimulation. *Journal of cognitive neuroscience*. 2014; 26(8):1775–84. [https://doi.org/10.1162/jocn\\_a\\_00595](https://doi.org/10.1162/jocn_a_00595) PMID: 24564464
56. Dambacher F, Sack AT, Lobbstaël J, Arntz A, Brugman S, Schuhmann T. A network approach to response inhibition: dissociating functional connectivity of neural components involved in action restraint and action cancellation. *European Journal of Neuroscience*. 2014; 39(5):821–31. <https://doi.org/10.1111/ejn.12425> PMID: 24289860
57. dos Santos Tascone L, Payne ME, MacFall J, Azevedo D, de Castro CC, Steffens DC, et al. Cortical brain volume abnormalities associated with few or multiple neuropsychiatric symptoms in Alzheimer's disease. *PloS one*. 2017; 12(5):e0177169. <https://doi.org/10.1371/journal.pone.0177169> PMID: 28481904
58. Wang W-Y, Yu J-T, Liu Y, Yin R-H, Wang H-F, Wang J, et al. Voxel-based meta-analysis of grey matter changes in Alzheimer's disease. *Translational neurodegeneration*. 2015; 4(1):6.
59. Terry DP, Sabatinelli D, Puente AN, Lazar NA, Miller LS. A meta-analysis of fMRI activation differences during episodic memory in Alzheimer's disease and mild cognitive impairment. *Journal of neuroimaging*. 2015; 25(6):849–60. <https://doi.org/10.1111/jon.12266> PMID: 26076800
60. Moriai-Izawa A, Dan H, Dan I, Sano T, Oguro K, Yokota H, et al. Multichannel fNIRS assessment of overt and covert confrontation naming. *Brain and language*. 2012; 121(3):185–93. <https://doi.org/10.1016/j.bandl.2012.02.001> PMID: 22429907
61. Taylor J, Rastle K, Davis MH. Can cognitive models explain brain activation during word and pseudo-word reading? A meta-analysis of 36 neuroimaging studies. *Psychological Bulletin*. 2013; 139(4):766–91. <https://doi.org/10.1037/a0030266> PMID: 23046391
62. Wang S, Zhang Y, Liu G, Phillips P, Yuan T-F. Detection of Alzheimer's disease by three-dimensional displacement field estimation in structural magnetic resonance imaging. *Journal of Alzheimer's Disease*. 2016; 50(1):233–48. <https://doi.org/10.3233/JAD-150848> PMID: 26682696
63. Nishida K, Pascual-Marqui R, Yoshimura M, Kitaura Y, Mii H, Isotani T, et al. 1-AD-16. The characteristics of resting-state EEG connectivity in patients with Alzheimer's disease by the LORETA. *Clinical Neurophysiology*. 2015; 126(6):e54.
64. Guo Z, Liu X, Hou H, Wei F, Liu J, Chen X. Abnormal degree centrality in Alzheimer's disease patients with depression: A resting-state functional magnetic resonance imaging study. *Experimental gerontology*. 2016; 79:61–6. <https://doi.org/10.1016/j.exger.2016.03.017> PMID: 27079332
65. Chatelle C, Thibaut A, Bruno M-A, Boly M, Bernard C, Hustinx R, et al. Nociception Coma Scale–Revised Scores Correlate With Metabolism in the Anterior Cingulate Cortex. *Neurorehabilitation and neural repair*. 2014; 28(2):149–52. <https://doi.org/10.1177/1545968313503220> PMID: 24065132
66. Multani N, Anor CJ, Tang-Wai DF, Keren R, Fox S, Lang AE, et al. Functional connectivity of the anterior cingulate cortex in Alzheimer's disease, Parkinson's disease and frontotemporal dementia. *Alzheimer's & Dementia the Journal of the Alzheimers Association*. 2016; 12(7):P922.
67. Landin-Romero R, Kumfor F, Leyton CE, Irish M, Hodges JR, Piguet O. Disease-specific patterns of cortical and subcortical degeneration in a longitudinal study of Alzheimer's disease and behavioural-variant frontotemporal dementia. *Neuroimage*. 2017; 151:72–80. <https://doi.org/10.1016/j.neuroimage.2016.03.032> PMID: 27012504
68. Huey ED, Lee S, Cheran G, Grafman J, Devanand DP. Brain Regions Involved in Arousal and Reward Processing are Associated with Apathy in Alzheimer's Disease and Frontotemporal Dementia. *Journal of Alzheimer's Disease*. 2017; 55(2):551–8. <https://doi.org/10.3233/JAD-160107> PMID: 27802220
69. Wang Y, Chen K, Yao L, Jin Z, Guo X, Initiative AsDN. Structural interactions within the default mode network identified by Bayesian network analysis in Alzheimer's disease. *PloS one*. 2013; 8(8):e74070. <https://doi.org/10.1371/journal.pone.0074070> PMID: 24015315
